# Supplementary material
Source: ML conference proceedings conference paper supplement (https://proceedings.mlr.press/v32/steinhardt14.html)
Supplement: Supplementary file [file steinhardt14-supp.pdf]

## A. Pruning a hierarchical decomposition

To provide further intuition for how our method behaves, we have included the hierarchical decomposition for one of the test examples from our experiments:

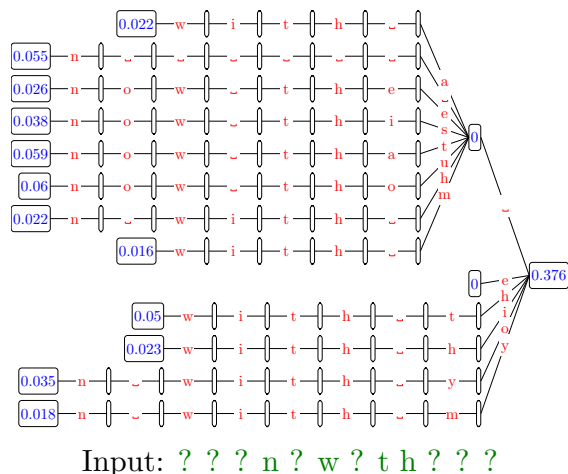

This is the hierarchical decomposition used to infer the missing characters for the phrase  $\dots??n?w?th??\dots$ . The decomposition doesn't waste resources representing the first 3 unknown characters, and maintains plausible hypotheses for the hidden characters such as  $\dots$ with a...,  $\dots$ now thee..., and  $\dots$ now this.... Each blue decimal number indicates a region in the decomposition together with the local probability mass assigned to that region.

## B. Pruning a hierarchical decomposition

In our inference algorithm for choosing a good hierarchical decomposition  $B$ , we had two major steps: refining the decomposition, and pruning it back down to a given size  $k$ . In this appendix, we will provide a dynamic programming algorithm for computing an optimal pruning  $B$  of  $A$ , assuming that  $\text{Fit}(a, \mathcal{C}_B(a))$  depends only on  $a$ . Let  $\hat{p}_{\theta_A}$  be the approximating distribution corresponding to  $A$ , and  $\hat{p}_{\theta_B}$  be the approximating distribution corresponding to  $B$ . Our goal is to minimize  $\text{KL}(p^* \parallel \hat{p}_{\theta_B})$ ; we will make the assumption that  $A$  and  $\theta_A$  are chosen well enough that  $\hat{p}_{\theta_A}$  is already close to  $p^*$ , and thus that  $\text{KL}(\hat{f}_{\theta_A} \parallel \hat{f}_{\theta_B})$  is a good surrogate for  $\text{KL}(p^* \parallel \hat{p}_{\theta_B})$ . We will also ignore normalization constants and instead consider the divergence  $\text{KL}(\hat{f}_{\theta_A} \parallel \hat{f}_{\theta_B})$  between the unnormalized distributions  $\hat{f}_{\theta_A}$  and  $\hat{f}_{\theta_B}$ . Formally, we will solve the following problem:

Given a hierarchical decomposition  $A$ , and assuming that  $\text{Fit}(a, \mathcal{C}_B(a))$  depends only on  $a$ , find the subset  $B \subseteq A$  of vertices of size  $k$  such that  $\text{KL}(\hat{f}_{\theta_A} \parallel \hat{f}_{\theta_B})$  is minimized.

For a hierarchical decomposition  $A$  and a subset  $B$  of  $A$ , let  $\alpha_B(a)$  denote the smallest  $b \in B$  such that  $a \subseteq b$ . By equation (4), we have

$$\text{KL}(\hat{f}_{\theta_A} \parallel \hat{f}_{\theta_B}) = \sum_{a \in A} \text{KL}_{a^\circ}(\hat{f}_{\theta_A} \parallel \hat{f}_{\theta_B}) \quad (19)$$

$$= \sum_{a \in A} \text{KL}_{a^\circ}(\hat{f}_{\theta_A} \parallel \hat{f}_{\theta_{\alpha_B(a)}}) \quad (20)$$

$$= \sum_{a \in A} K_{a^\circ}(a \parallel \alpha_B(a)), \quad (21)$$

where  $K_c(a \parallel b) \stackrel{\text{def}}{=} \sum_{x \in c} \hat{f}_{\theta_a}(x) \log \left( \frac{\hat{f}_{\theta_a}(x)}{\hat{f}_{\theta_b}(x)} \right)$ . It is here that we make use of the assumption that  $\text{Fit}(\alpha_B(a), \mathcal{C}_B(\alpha_B(a)))$  depends only on  $a$ ; otherwise,  $K_{a^\circ}(a \parallel \alpha_B(a))$  would depend on the particular value of  $\mathcal{C}_B(\alpha_B(a))$ .

In the remainder of this appendix, we will write out a succession of recursive formulas for computing  $\text{KL}(\hat{f}_{\theta_A} \parallel \hat{f}_{\theta_B})$ , expanding the state space each time until we eventually have a recursion for optimizing  $\text{KL}(\hat{f}_{\theta_A} \parallel \hat{f}_{\theta_B})$  over all subsets  $B \subseteq A$  of size  $k$ .

**Computing  $\text{KL}(\hat{f}_{\theta_A} \parallel \hat{f}_{\theta_B})$  for fixed  $B$ .** To make the expression in (21) more amenable to dynamic programming, we will write it out recursively. For  $a \subseteq p$ , define  $D(a, p)$  to be the contribution of the descendants of  $a$  (including  $a$ ) to  $\text{KL}(\hat{f}_{\theta_A} \parallel \hat{f}_{\theta_B})$  assuming that  $\alpha_B(a) = p$ . More formally, we define  $D(a, p)$  recursively as

$$D(a, p) \stackrel{\text{def}}{=} \begin{cases} K_{a^\circ}(a \parallel a) + \sum_{b \in \mathcal{C}_A(a)} D(b, a) & : a \in B \\ K_{a^\circ}(a \parallel p) + \sum_{b \in \mathcal{C}_A(a)} D(b, p) & : a \notin B \end{cases} \quad (22)$$

(Note that  $K_{a^\circ}(a \parallel a)$  is equal to 0; we have left it in the recursion to expose the symmetry in the two cases.)

With this definition, one can verify that  $D(X, X)$  expands out to (21) and hence is equal to  $\text{KL}(\hat{f}_{\theta_A} \parallel \hat{f}_{\theta_B})$ . (Recall that  $X$  is the entire state space and is always an element of  $A$ .)

**Optimizing over  $B$ .** Equation (22) gives us a recursive formula for  $\text{KL}(\hat{f}_{\theta_A} \parallel \hat{f}_{\theta_B})$  when  $B$  is fixed. However, the only dependence on  $B$  is in deciding between the two cases in the recursion, so it is easy to ex-

tend the recursion to simultaneously choose  $B$ . In particular, define the three-variable function  $D(a, p, m)$  to be the minimum value of  $D(a, p)$  if there are  $m$  elements in  $B$  that are contained in  $a$  (including, possibly,  $a$  itself). We then have the recursion

$$D(a, p, m) \stackrel{\text{def}}{=} \min \left\{ \begin{array}{l} K_{a^\circ}(a||a) + \min_{\sum m_b = m-1} \left[ \sum_{b \in \mathcal{C}_A(a)} D(b, a, m_b) \right], \\ K_{a^\circ}(a||p) + \min_{\sum m_b = m} \left[ \sum_{b \in \mathcal{C}_A(a)} D(b, p, m_b) \right]. \end{array} \right. \quad (23)$$

The first case corresponds to including  $a$  in  $B$ , in which case we have  $m - 1$  remaining elements of  $B$  to distribute among the descendants of  $a$ . The second case corresponds to excluding  $a$  from  $B$ , in which case we have  $m$  elements of  $B$  to distribute. Now  $D(X, X, k)$  is the minimum value of  $D(X, X)$  across all subsets  $B$  of size  $k$ , which is the quantity we are after.

**Computing the minimum tractably.** We are almost done, but we need an efficient way to compute the minimum over all  $m_j$  that sum to  $m$ . To do this, number the children of  $a$  as  $b_1, b_2, \dots$ , and define the *four-variable* function  $D(a, p, m, j)$ , which, intuitively, tracks the minimum value of  $D(a, p)$  if there are  $m$  elements in  $B$  left to be distributed among children  $b_j, b_{j+1}, \dots$  and their subtrees. More formally, define  $D(a, p, m, j)$  via

$$D(a, p, m, j) \stackrel{\text{def}}{=} \begin{cases} \min \{D(a, a, m-1, 0), D(a, p, m, 0)\} & : j = -1 \\ \min_{0 \leq m' \leq m} \{D(b_j, p, m', -1) + D(a, p, m-m', j+1)\} & : 0 \leq j < |\mathcal{C}_A(a)| \\ K_{a^\circ}(a||p) & : j = |\mathcal{C}_A(a)|. \end{cases} \quad (24)$$

The three cases can be thought of as follows:

- $D(a, p, m, -1)$  decides whether or not to include  $a$  in  $B$
- $D(a, p, m, j)$  decides how many elements of  $B$  to include among the descendants of  $b_j$
- $D(a, p, m, |\mathcal{C}_A(a)|)$  computes the local contribution of  $a$  to  $\text{KL}(\hat{f}_{\theta_A} \parallel \hat{f}_{\theta_B})$ .

Overall, then,  $D(X, X, k, -1)$  is equal to the minimum value of  $\text{KL}(\hat{f}_{\theta_A} \parallel \hat{f}_{\theta_B})$  over all  $B \subseteq A$  with  $|B| = k$ .

**Runtime.** Suppose that the decomposition  $A$  has depth  $d$ . Then there are  $O(|A|d)$  triples  $(p, a, j)$ , so the size of the state space is  $O(|A|dk)$ . Furthermore, the first case of the recursion can be computed in  $O(1)$  time, the second case in  $O(k)$  time, and the final case in  $O(1)$  time (on average across all  $a$ ). Therefore, the runtime is  $O(|A|dk^2)$ .
